# Supplementary material for: A statistical learning method for simultaneous copy number estimation and subclone clustering with single-cell sequencing data
Source: HighWire-hosted journal article supplement (doi:10.1101/gr.278098.123), 2024-01-01
Supplement: Supplemental_Table_S1.xlsx [file Supplemental_Table_S1.xlsx]

## Sheet: Del.d
Supplemental Table S1: Assessment of FLCNA using simulation data with five clusters. Clustering results from FLCNA were compared to existing methods (i.e., SCOPE and HMMcopy) coupled with different clustering methods. Adjusted Rand Index (ARI) was utilized for eavluation. For each of five clusters, we added signals of 50 CNA segments to the background signals with varied lengths (super short: 2~5…
Shared CNA proportion	CNA Length (bins)	FLCNA	SCOPE_H	SCOPE_K	HMMcopy_H	HMMcopy_K
20	super short (2-5)	0.576	0.005	0.01	0.004	0.006
40	super short (2-5)	1	0.419	0.739	0.003	0.009
60	super short (2-5)	1	0.956	0.68	0.004	0.007
80	super short (2-5)	1	0.947	0.674	0.007	0
100	super short (2-5)	1	0.947	0.674	0.003	0.005
20	short (5-10)	0.855	0.024	0.269	0.002	0.004
40	short (5-10)	1	0.764	0.686	0.006	0.011
60	short (5-10)	1	0	0.666	0.015	0.025
80	short (5-10)	1	0	0.626	0.024	0.019
100	short (5-10)	1	0.002	0.371	0.019	0.03
20	medium (10-20)	1	0.004	0.783	0.004	0.315
40	medium (10-20)	1	0.027	0.391	0.249	0.693
60	medium (10-20)	1	0.092	0.23	1	1
80	medium (10-20)	1	0.173	0.291	1	1
100	medium (10-20)	1	0.382	0.282	1	1
20	long (20-35)	1	0.015	0.473	0	0.803
40	long (20-35)	1	0.169	0.252	0.823	0.691
60	long (20-35)	1	0.383	0.346	1	0.637
80	long (20-35)	1	0.585	0.663	1	0.691
100	long (20-35)	1	0.402	0.6	1	1

## Sheet: Del.s
Shared CNA proportion	CNA Length (bins)	FLCNA	SCOPE_H	SCOPE_K	HMMcopy_H	HMMcopy_K
20	super short (2-5)	0.006	0	0	0.008	0.006
40	super short (2-5)	0.172	0.001	0.013	0.006	0
60	super short (2-5)	0.832	0.107	0.749	0.003	0.001
80	super short (2-5)	0.592	0.707	0.675	0.003	0.001
100	super short (2-5)	1	0.894	0.654	0.004	0.005
20	short (5-10)	0.016	0.017	0.002	0.003	0.003
40	short (5-10)	0.848	0.033	0.323	0.007	0.003
60	short (5-10)	0.855	0.536	0.964	0.003	0.007
80	short (5-10)	1	0.881	0.663	0.003	0.008
100	short (5-10)	1	0.947	0.691	0.007	0.002
20	medium (10-20)	0.116	0.008	0.018	0.006	0.356
40	medium (10-20)	0.848	0.066	0.672	0.204	1
60	medium (10-20)	1	0.736	0.687	1	0.686
80	medium (10-20)	1	0.934	0.674	1	1
100	medium (10-20)	1	0.934	0.674	1	1
20	long (20-35)	0.438	0	0.05	0	0.705
40	long (20-35)	1	0.473	0.758	0.871	0.691
60	long (20-35)	1	0.612	0.691	1	0.644
80	long (20-35)	1	0.947	0.67	1	0.661
100	long (20-35)	1	0.834	0.691	1	1

## Sheet: mix
Shared CNA proportion	CNA Length (bins)	FLCNA	SCOPE_H	SCOPE_K	HMMcopy_H	HMMcopy_K
20	super short (2-5)	0.01	0.002	0.016	0.004	0.006
40	super short (2-5)	0.644	0.018	0.79	0.004	0.005
60	super short (2-5)	0.781	0.517	0.964	0.009	0
80	super short (2-5)	1	0.953	0.663	0.003	0.003
100	super short (2-5)	1	0.964	0.674	0.006	0
20	short (5-10)	0.005	0.003	0.021	0.004	0.005
40	short (5-10)	0.475	0.171	0.964	0.005	0.004
60	short (5-10)	1	0.904	1	0.01	0.045
80	short (5-10)	1	0.947	0.67	0.005	0.479
100	short (5-10)	1	0.708	0.67	0.003	0.621
20	medium (10-20)	0.116	0.028	0.275	0.004	0.105
40	medium (10-20)	1	0.44	0.672	0.007	0.973
60	medium (10-20)	1	0.688	0.691	0.72	0.986
80	medium (10-20)	1	0.937	0.653	1	1
100	medium (10-20)	1	0.692	0.692	1	0.665
20	long (20-35)	0.201	0.031	0.345	0.054	1
40	long (20-35)	0.947	0.003	0.655	0.584	1
60	long (20-35)	1	0.004	0.634	1	0.641
80	long (20-35)	1	0.023	0.584	1	0.691
100	long (20-35)	1	0.036	0.605	1	0.691

## Sheet: Dup.s
Shared CNA proportion	CNA Length (bins)	FLCNA	SCOPE_H	SCOPE_K	HMMcopy_H	HMMcopy_K
20	super short (2-5)	0	0.004	0	0.002	0.004
40	super short (2-5)	0	0	0.065	0.002	0.005
60	super short (2-5)	0.162	0.066	0.933	0.01	0.002
80	super short (2-5)	0.832	0.432	0.964	0.01	0.005
100	super short (2-5)	0.848	0.735	0.65	0	0.002
20	short (5-10)	0	0	0	0.003	0.003
40	short (5-10)	0.114	0.069	0.771	0.005	0.005
60	short (5-10)	0.832	0.507	0.964	0.007	0.001
80	short (5-10)	0.839	0.853	0.674	0.004	0.004
100	short (5-10)	0.989	0.947	0.665	0.006	0.005
20	medium (10-20)	0.006	0	0.009	0.003	0.004
40	medium (10-20)	0.576	0.314	0.758	0.006	0.008
60	medium (10-20)	0.855	0.887	0.989	0.001	0.03
80	medium (10-20)	1	0.947	0.67	0.006	0.272
100	medium (10-20)	1	0.934	0.685	0.011	0.238
20	long (20-35)	0.034	0.008	0.093	0	0.171
40	long (20-35)	0.592	0.585	0.976	0.195	1
60	long (20-35)	0.989	0.947	0.68	1	0.639
80	long (20-35)	1	0.944	0.674	1	0.633
100	long (20-35)	1	0.953	0.68	1	0.657

## Sheet: Dup.d
Shared CNA proportion	CNA Length (bins)	FLCNA	SCOPE_H	SCOPE_K	HMMcopy_H	HMMcopy_K
20	super short (2-5)	0.006	0.01	0.347	0.002	0.004
40	super short (2-5)	0.839	0.818	0.989	0	0.004
60	super short (2-5)	0.839	0.944	0.637	0.003	0
80	super short (2-5)	1	0.947	0.67	0.003	0.001
100	super short (2-5)	1	0.953	0.67	0.003	0
20	short (5-10)	0.113	0.025	0.736	0.005	0.003
40	short (5-10)	0.848	0.824	1	0.004	0.202
60	short (5-10)	1	0.956	0.67	0.005	0.664
80	short (5-10)	1	0.808	0.665	0.727	0.676
100	short (5-10)	1	0.964	0.68	1	0.693
20	medium (10-20)	0.26	0.168	0.97	0.005	1
40	medium (10-20)	1	0.956	0.633	0.636	0.633
60	medium (10-20)	1	0.947	0.633	1	0.637
80	medium (10-20)	1	0.956	0.665	1	0.633
100	medium (10-20)	1	0.713	0.665	1	0.685
20	long (20-35)	0.576	0.147	0.816	0.434	0.798
40	long (20-35)	1	0.956	0.755	1	0.639
60	long (20-35)	1	0.964	0.633	1	1
80	long (20-35)	1	0.964	0.634	1	1
100	long (20-35)	1	1	0.67	1	0.685
