# Supplementary material for: A statistical learning method for simultaneous copy number estimation and subclone clustering with single-cell sequencing data
Source: HighWire-hosted journal article supplement (doi:10.1101/gr.278098.123), 2024-01-01
Supplement: Supplemental_Table_S2.xlsx [file Supplemental_Table_S2.xlsx]

## Sheet: Del.d
Supplemental Table S2: Assessment of FLCNA using simulation data with three clusters. Clustering results from FLCNA were compared to existing methods (i.e., SCOPE and HMMcopy) coupled with different clustering methods. Adjusted Rand Index (ARI) was utilized for eavluation. For each of three clusters, we added signals of 50 CNA segments to the background signals with varied lengths (super short: 2…
Shared CNA proportion	CNA Length (bins)	FLCNA	SCOPE_H	SCOPE_K	HMMcopy_H	HMMcopy_K
20	super short (2-5)	0.575	0	0.278	0.011	0
40	super short (2-5)	1	0.86	0.531	0	0
60	super short (2-5)	1	0.97	0.45	0	0
80	super short (2-5)	1	0.97	0.448	0	0
100	super short (2-5)	1	0.97	0.448	0	0.001
20	short (5-10)	1	0.131	0.401	0	0
40	short (5-10)	1	0.554	0.554	0	0
60	short (5-10)	1	0	0.897	0.001	0.002
80	short (5-10)	1	0	0.501	0.002	0.001
100	short (5-10)	1	0.002	0.467	0.05	0.05
20	medium (10-20)	1	0	0.558	0	0.566
40	medium (10-20)	1	0.038	0.341	0.925	0.91
60	medium (10-20)	1	0.088	0.235	1	1
80	medium (10-20)	1	0	0.163	1	1
100	medium (10-20)	1	0	0.032	1	1
20	long (20-35)	1	0.002	0.376	0	1
40	long (20-35)	1	0.19	0.118	1	0.44
60	long (20-35)	1	0.375	0.407	1	1
80	long (20-35)	1	0.003	0.496	1	1
100	long (20-35)	1	0	0.536	1	1

## Sheet: Del.s
Shared CNA proportion	CNA Length (bins)	FLCNA	SCOPE_H	SCOPE_K	HMMcopy_H	HMMcopy_K
20	super short (2-5)	0	0	0.009	0	0.001
40	super short (2-5)	0.032	0.026	0.271	0.001	0.001
60	super short (2-5)	0.575	0.409	0.912	0	0
80	super short (2-5)	1	0.97	0.543	0	0
100	super short (2-5)	1	0.941	0.547	0	0
20	short (5-10)	0.011	0	0.032	0.001	0.002
40	short (5-10)	0.531	0.094	0.912	0	0
60	short (5-10)	1	0.97	1	0.001	0
80	short (5-10)	1	0.97	0.547	0.001	0.002
100	short (5-10)	1	0.97	0.443	0.001	0.001
20	medium (10-20)	0.031	0.031	0.197	0.006	0.455
40	medium (10-20)	1	0.507	0.956	0.573	0.56
60	medium (10-20)	1	0.554	1	0.548	1
80	medium (10-20)	1	0.97	1	1	1
100	medium (10-20)	1	0.97	1	1	1
20	long (20-35)	0.527	0.028	0.925	0.295	0.512
40	long (20-35)	1	0.546	0.554	1	1
60	long (20-35)	1	0.941	0.464	1	1
80	long (20-35)	1	0.97	1	1	1
100	long (20-35)	1	0.543	0.585	1	1

## Sheet: mix
Shared CNA proportion	CNA Length (bins)	FLCNA	SCOPE_H	SCOPE_K	HMMcopy_H	HMMcopy_K
20	super short (2-5)	0	0.002	0.027	0	0
40	super short (2-5)	0.517	0.182	0.926	0	0
60	super short (2-5)	0.985	0.941	1	0	0.001
80	super short (2-5)	1	0.97	1	0	0
100	super short (2-5)	1	0.97	0.484	0.001	0
20	short (5-10)	0.328	0.011	0.252	0.001	0
40	short (5-10)	0.97	0.76	0.94	0.001	0.118
60	short (5-10)	1	0.97	1	0.001	0.334
80	short (5-10)	1	0.97	1	0.001	0.446
100	short (5-10)	1	0.97	1	0.504	0.909
20	medium (10-20)	0.341	0.008	0.808	0	0.054
40	medium (10-20)	0.97	0.955	0.985	0	0.939
60	medium (10-20)	1	0.926	1	0.985	1
80	medium (10-20)	1	0.97	1	1	1
100	medium (10-20)	1	0.97	0.476	1	1
20	long (20-35)	0.435	0.003	0.488	0.001	1
40	long (20-35)	0.985	0.553	1	1	1
60	long (20-35)	1	0	1	1	1
80	long (20-35)	1	0.01	0.97	1	1
100	long (20-35)	1	0.039	0.502	1	1

## Sheet: Dup.s
Shared CNA proportion	CNA Length (bins)	FLCNA	SCOPE_H	SCOPE_K	HMMcopy_H	HMMcopy_K
20	super short (2-5)	0	0	0.012	0	0
40	super short (2-5)	0.011	0.039	0.237	0.001	0
60	super short (2-5)	0.017	0.095	0.912	0	0
80	super short (2-5)	0.521	0.737	0.955	0	0
100	super short (2-5)	1	0.941	0.547	0	0
20	short (5-10)	0	0	0.029	0.001	0.001
40	short (5-10)	0.009	0.12	0.912	0.001	0.002
60	short (5-10)	0.575	0.97	1	0.001	0
80	short (5-10)	1	0.97	0.448	0	0.001
100	short (5-10)	1	0.97	1	0	0
20	medium (10-20)	0	0.012	0.015	0	0
40	medium (10-20)	0.575	0.739	0.94	0	0.001
60	medium (10-20)	1	0.97	0.48	0	0.001
80	medium (10-20)	1	0.941	0.499	0	0.444
100	medium (10-20)	1	0.97	0.468	0.001	0.896
20	long (20-35)	0.007	0.016	0.436	0.002	0.94
40	long (20-35)	1	0.522	0.553	0.001	1
60	long (20-35)	1	0.97	0.48	1	1
80	long (20-35)	1	0.97	0.547	1	1
100	long (20-35)	1	0.97	0.499	1	1

## Sheet: Dup.d
Shared CNA proportion	CNA Length (bins)	FLCNA	SCOPE_H	SCOPE_K	HMMcopy_H	HMMcopy_K
20	super short (2-5)	0	0.001	0.511	0	0
40	super short (2-5)	0.531	0.955	0.528	0.001	0
60	super short (2-5)	1	0.97	0.453	0.001	0.002
80	super short (2-5)	1	0.97	0.504	0	0.001
100	super short (2-5)	1	0.97	0.489	0	0.001
20	short (5-10)	0.021	0.058	0.521	0.001	0
40	short (5-10)	1	0.97	0.443	0	0.414
60	short (5-10)	1	0.97	1	0.001	1
80	short (5-10)	1	0.97	0.44	1	1
100	short (5-10)	1	0.97	0.464	1	1
20	medium (10-20)	0.575	0	0.437	0	0.971
40	medium (10-20)	1	0.97	0.547	1	0.54
60	medium (10-20)	1	0.941	0.468	1	1
80	medium (10-20)	1	0.97	0.448	1	1
100	medium (10-20)	1	0.941	0.547	1	1
20	long (20-35)	1	0.57	0.48	0.591	1
40	long (20-35)	1	0.941	1	1	0.44
60	long (20-35)	1	0.955	1	1	0.44
80	long (20-35)	1	0.97	1	1	0.444
100	long (20-35)	1	1	0.547	1	1
