# Supplementary material for: A statistical learning method for simultaneous copy number estimation and subclone clustering with single-cell sequencing data
Source: HighWire-hosted journal article supplement (doi:10.1101/gr.278098.123), 2024-01-01
Supplement: Supplemental_Table_S3.xlsx [file Supplemental_Table_S3.xlsx]

## Sheet: Del.d
Supplemental Table S3: Assessment of FLCNA using simulation data with five clustersa and varied number of CNAs. Clustering results from FLCNA were compared to existing methods (i.e., SCOPE and HMMcopy) coupled with different clustering methods. Adjusted Rand Index (ARI) was utilized for eavluation. For each of five clusters, we added signals of varied numbers of CNA segments (20~80) to the backgr…
Shared CNA proportion	CNA Length (bins)	FLCNA	SCOPE_H	SCOPE_K	HMMcopy_H	HMMcopy_K
20	super short (2-5)	0.444	0.01	0.055	0.001	0.006
40	super short (2-5)	0.815	0.237	0.675	0.008	0.001
60	super short (2-5)	1	0.402	0.67	0.004	0.002
80	super short (2-5)	1	0.458	0.652	0	0
100	super short (2-5)	1	0.464	0.692	0.005	0.002
20	short (5-10)	0.756	0.028	0.348	0.001	0.005
40	short (5-10)	1	0.005	0.655	0.008	0.001
60	short (5-10)	1	0.006	0.648	0.007	0.012
80	short (5-10)	1	0.009	0.638	0.021	0.026
100	short (5-10)	1	0.021	0.399	0.027	0.027
20	medium (10-20)	0.793	0.009	0.355	0.007	0.168
40	medium (10-20)	1	0.04	0.389	0.459	0.619
60	medium (10-20)	1	0.166	0.257	0.665	0.414
80	medium (10-20)	1	0.306	0.264	1	0.418
100	medium (10-20)	1	0.331	0.311	0.985	0.427
20	long (20-35)	0.985	0.053	0.346	0.169	0.397
40	long (20-35)	1	0.327	0.215	0.454	0.394
60	long (20-35)	1	0.268	0.373	0.65	0.394
80	long (20-35)	1	0.252	0.41	1	0.396
100	long (20-35)	1	0.223	0.435	1	0.406

## Sheet: Del.s
Shared CNA proportion	CNA Length (bins)	FLCNA	SCOPE_H	SCOPE_K	HMMcopy_H	HMMcopy_K
20	super short (2-5)	0.012	0	0	0.002	0
40	super short (2-5)	0.111	0.002	0.052	0.012	0
60	super short (2-5)	0.462	0.059	0.426	0.002	0
80	super short (2-5)	0.471	0.407	0.663	0.004	0.004
100	super short (2-5)	0.815	0.541	0.663	0.003	0
20	short (5-10)	0	0.004	0.012	0.002	0.001
40	short (5-10)	0.427	0.015	0.302	0.006	0.005
60	short (5-10)	0.815	0.355	0.672	0.004	0.005
80	short (5-10)	0.815	0.601	0.67	0.005	0.007
100	short (5-10)	1	0.934	0.67	0.002	0.005
20	medium (10-20)	0.147	0.008	0.024	0.006	0.131
40	medium (10-20)	0.454	0.27	0.67	0.443	0.448
60	medium (10-20)	0.989	0.843	0.686	0.651	0.619
80	medium (10-20)	1	0.664	0.67	0.664	0.691
100	medium (10-20)	1	0.458	0.674	1	0.685
20	long (20-35)	0.238	0.022	0.342	0.016	0.424
40	long (20-35)	0.458	0.469	0.675	0.44	0.394
60	long (20-35)	1	0.657	0.689	0.682	0.396
80	long (20-35)	1	0.455	0.691	0.692	0.404
100	long (20-35)	1	0.458	0.804	1	0.407

## Sheet: mix
Shared CNA proportion	CNA Length (bins)	FLCNA	SCOPE_H	SCOPE_K	HMMcopy_H	HMMcopy_K
20	super short (2-5)	0	0.004	0.009	0.008	0.006
40	super short (2-5)	0.443	0.055	0.412	0.007	0.001
60	super short (2-5)	0.685	0.346	0.649	0.006	0.005
80	super short (2-5)	0.691	0.616	0.652	0.001	0.004
100	super short (2-5)	1	0.458	0.675	0.003	0.004
20	short (5-10)	0.08	0.022	0.021	0.007	0.005
40	short (5-10)	0.431	0.154	0.661	0.007	0.001
60	short (5-10)	1	0.428	0.634	0.072	0.258
80	short (5-10)	1	0.458	0.674	0.002	0.345
100	short (5-10)	1	0.458	0.674	0.187	0.575
20	medium (10-20)	0.143	0.021	0.215	0.013	0.137
40	medium (10-20)	0.614	0.144	0.719	0.175	0.376
60	medium (10-20)	0.985	0.451	0.816	0.662	0.621
80	medium (10-20)	1	0.452	0.687	0.693	0.646
100	medium (10-20)	1	0.006	0.798	1	1
20	long (20-35)	0.253	0.005	0.335	0.01	0.584
40	long (20-35)	0.876	0.003	0.376	0.464	0.414
60	long (20-35)	1	0.011	0.376	0.674	0.396
80	long (20-35)	1	0.034	0.396	1	0.4
100	long (20-35)	1	0.06	0.379	1	0.407

## Sheet: Dup.s
Shared CNA proportion	CNA Length (bins)	FLCNA	SCOPE_H	SCOPE_K	HMMcopy_H	HMMcopy_K
20	super short (2-5)	0	0	0.007	0.005	0.006
40	super short (2-5)	0.009	0.002	0.057	0.005	0.003
60	super short (2-5)	0.221	0.02	0.434	0.005	0.005
80	super short (2-5)	0.47	0.213	0.655	0.001	0.006
100	super short (2-5)	0.462	0.527	0.663	0.004	0.001
20	short (5-10)	0	0.008	0.007	0.007	0.004
40	short (5-10)	0.199	0.106	0.332	0.002	0
60	short (5-10)	0.48	0.251	0.673	0.003	0.004
80	short (5-10)	0.471	0.653	0.66	0.005	0.006
100	short (5-10)	0.815	0.673	0.675	0.003	0.004
20	medium (10-20)	0	0.022	0.017	0.004	0.007
40	medium (10-20)	0.458	0.223	0.428	0.005	0.014
60	medium (10-20)	0.471	0.236	0.668	0.018	0.098
80	medium (10-20)	0.808	0.458	0.798	0.004	0.168
100	medium (10-20)	1	0.458	0.798	0.004	0.178
20	long (20-35)	0.011	0.029	0.331	0.005	0.322
40	long (20-35)	0.458	0.282	0.448	0.371	0.608
60	long (20-35)	0.685	0.455	0.686	0.44	0.637
80	long (20-35)	1	0.458	0.436	0.692	0.633
100	long (20-35)	1	0.458	0.417	0.657	0.409

## Sheet: Dup.d
Shared CNA proportion	CNA Length (bins)	FLCNA	SCOPE_H	SCOPE_K	HMMcopy_H	HMMcopy_K
20	super short (2-5)	0.016	0.017	0.32	0.003	0.006
40	super short (2-5)	0.462	0.351	0.667	0.005	0.007
60	super short (2-5)	0.815	0.458	0.661	0.005	0.004
80	super short (2-5)	1	0.458	0.435	0.004	0.004
100	super short (2-5)	1	0.458	0.419	0.004	0.003
20	short (5-10)	0.131	0.113	0.38	0.004	0.004
40	short (5-10)	0.782	0.245	0.398	0.061	0.255
60	short (5-10)	0.989	0.458	0.398	0.326	0.595
80	short (5-10)	1	0.458	0.417	0.477	0.653
100	short (5-10)	1	0.458	0.439	0.682	0.685
20	medium (10-20)	0.449	0.116	0.342	0.003	0.633
40	medium (10-20)	0.811	0.389	0.394	0.455	0.397
60	medium (10-20)	1	0.458	0.398	0.678	0.395
80	medium (10-20)	1	0.458	0.4	1	0.4
100	medium (10-20)	1	0.675	0.423	1	0.417
20	long (20-35)	0.458	0.109	0.379	0.247	0.388
40	long (20-35)	1	0.431	0.399	0.43	0.397
60	long (20-35)	1	0.458	0.398	0.653	0.394
80	long (20-35)	1	0.657	0.404	1	0.401
100	long (20-35)	1	0.691	0.412	1	0.415
