# Supplementary material for: A statistical learning method for simultaneous copy number estimation and subclone clustering with single-cell sequencing data
Source: HighWire-hosted journal article supplement (doi:10.1101/gr.278098.123), 2024-01-01
Supplement: Supplemental_Table_S5.xlsx [file Supplemental_Table_S5.xlsx]

## Sheet: super short
Supplemental Table S5. Assessment of FLCNA to detect CNAs using simulation data with five clusters. CNA calls were generated by FLCNA, SCOPE and HMMcopy, respectively. For each of five clusters, we added signals of 50 CNA segments to the background signals with varied lengths (super short: 2~5 markers, short: 5~10 markers, medium: 10~20 markers, and long: 20~35 markers) and varied CNA proportions…
Shared CNA proportion	CNA type	FLCNA						SCOPE						HMMcopy
		tp	fp	fn	precision	recall	F1	tp	fp	fn	precision	recall	F1	tp	fp	fn	precision	recall	F1
20	Del.d	569	1940	1431	0.226784	0.2845	0.252384	1000	53307	1000	0.018	0.5	0.036	255	210	1745	0.548	0.128	0.207
40	Del.d	3950	2285	0	0.63352	1	0.77565	3948	58253	2	0.063	0.999	0.119	907	0	3043	1	0.23	0.373
60	Del.d	6050	2810	0	0.682844	1	0.811536	6047	61324	3	0.09	1	0.165	1440	0	4610	1	0.238	0.385
80	Del.d	7999	3098	1	0.720825	0.999875	0.837723	7998	62883	2	0.113	1	0.203	1863	0	6137	1	0.233	0.378
100	Del.d	10000	0	0	1	1	1	9997	62593	3	0.138	1	0.242	2342	0	7658	1	0.234	0.38
20	Del.s	53	1400	1947	0.0364763	0.0265	0.0306979	248	47583	1752	0.005	0.124	0.01	49	416	1951	0.105	0.024	0.04
40	Del.s	63	1288	3887	0.0466321	0.0159494	0.0237691	0	49165	3950	0	0	0	0	480	3950	0	0	0
60	Del.s	2209	868	3841	0.717907	0.365124	0.484058	4186	46699	1864	0.082	0.692	0.147	1020	0	5030	1	0.169	0.289
80	Del.s	3515	2247	4485	0.610031	0.439375	0.510827	3888	48303	4112	0.074	0.486	0.129	989	0	7011	1	0.124	0.22
100	Del.s	9572	3778	428	0.717004	0.9572	0.819872	9968	43165	32	0.188	0.997	0.316	2573	0	7427	1	0.257	0.409
20	mix	55	1645	1945	0.0323529	0.0275	0.0297297	449	49442	1551	0.009	0.224	0.017	114	361	1886	0.24	0.057	0.092
40	mix	566	915	3384	0.382174	0.143291	0.208433	2810	46543	1140	0.057	0.711	0.105	800	0	3150	1	0.203	0.337
60	mix	1635	56	4415	0.966884	0.270248	0.422426	4685	48425	1365	0.088	0.774	0.158	1261	0	4789	1	0.208	0.345
80	mix	4104	94	3896	0.977608	0.513	0.672897	7208	43446	792	0.142	0.901	0.246	1929	0	6071	1	0.241	0.389
100	mix	6097	1	3903	0.999836	0.6097	0.757485	9050	43528	950	0.172	0.905	0.289	2458	0	7542	1	0.246	0.395
20	Dup.s	16	1424	1984	0.0111111	0.008	0.00930233	198	49475	1802	0.004	0.099	0.008	46	419	1954	0.099	0.023	0.037
40	Dup.s	28	1436	3922	0.0191257	0.00708861	0.0103436	392	50828	3558	0.008	0.099	0.014	106	354	3844	0.23	0.027	0.048
60	Dup.s	54	1510	5996	0.0345269	0.00892562	0.0141844	989	52121	5061	0.019	0.163	0.033	256	209	5794	0.551	0.042	0.079
80	Dup.s	1645	17	6355	0.989771	0.205625	0.340509	4387	49852	3613	0.081	0.548	0.141	1295	0	6705	1	0.162	0.279
100	Dup.s	5091	844	4909	0.857793	0.5091	0.638971	5517	49855	4483	0.1	0.552	0.169	1677	0	8323	1	0.168	0.287
20	Dup.d	51	1350	1949	0.0364026	0.0255	0.0299912	617	46656	1383	0.013	0.308	0.025	144	318	1856	0.312	0.072	0.117
40	Dup.d	1444	1217	2506	0.542653	0.36557	0.436848	2386	47182	1564	0.048	0.604	0.089	663	0	3287	1	0.168	0.287
60	Dup.d	4200	2296	1850	0.646552	0.694215	0.669536	4687	49425	1363	0.087	0.775	0.156	1331	0	4719	1	0.22	0.361
80	Dup.d	7767	2936	233	0.725684	0.970875	0.830562	7124	49140	876	0.127	0.89	0.222	1894	0	6106	1	0.237	0.383
100	Dup.d	9736	1887	264	0.837649	0.9736	0.900523	8901	48667	1099	0.155	0.89	0.263	2288	0	7712	1	0.229	0.372

## Sheet: short
Shared CNA proportion	CNA type	FLCNA						SCOPE						HMMcopy
		tp	fp	fn	precision	recall	F1	tp	fp	fn	precision	recall	F1	tp	fp	fn	precision	recall	F1
20	Del.d	849	2007	1151	0.297269	0.4245	0.349671	1400	61545	600	0.022	0.7	0.043	341	238	1659	0.589	0.17	0.264
40	Del.d	3950	2555	0	0.607225	1	0.755619	3950	62063	0	0.06	1	0.113	1154	0	2796	1	0.292	0.452
60	Del.d	6050	2943	0	0.672745	1	0.804361	6050	61768	0	0.089	1	0.164	1983	0	4067	1	0.328	0.494
80	Del.d	8000	3589	0	0.69031	1	0.816785	8000	59054	0	0.119	1	0.213	2769	0	5231	1	0.346	0.514
100	Del.d	10000	669	0	0.937295	1	0.967633	10000	57955	0	0.147	1	0.257	3619	0	6381	1	0.362	0.531
20	Del.s	46	1244	1954	0.0356589	0.023	0.0279635	0	50805	2000	0	0	0	0	544	2000	0	0	0
40	Del.s	38	896	3912	0.0406852	0.00962025	0.015561	0	55214	3950	0	0	0	0	620	3950	0	0	0
60	Del.s	2372	1144	3678	0.67463	0.392066	0.495923	4196	55582	1854	0.07	0.694	0.127	1363	0	4687	1	0.225	0.368
80	Del.s	7688	3490	312	0.68778	0.961	0.801752	7996	54449	4	0.128	1	0.227	2652	0	5348	1	0.332	0.498
100	Del.s	9875	656	125	0.937708	0.9875	0.96196	9992	56104	8	0.151	0.999	0.263	3799	0	6201	1	0.38	0.551
20	mix	58	1849	1942	0.0304143	0.029	0.0296903	0	53054	2000	0	0	0	0	589	2000	0	0	0
40	mix	587	968	3363	0.377492	0.148608	0.213261	1475	45663	2475	0.031	0.373	0.058	718	0	3232	1	0.182	0.308
60	mix	2647	22	3403	0.991757	0.437521	0.60718	5583	38332	467	0.127	0.923	0.223	3021	0	3029	1	0.499	0.666
80	mix	5492	167	2508	0.970489	0.6865	0.804158	7530	28217	470	0.211	0.941	0.344	4595	0	3405	1	0.574	0.73
100	mix	8110	0	1890	1	0.811	0.895638	9453	23971	547	0.283	0.945	0.435	6439	0	3561	1	0.644	0.783
20	Dup.s	43	1428	1957	0.0292318	0.0215	0.0247767	194	48035	1806	0.004	0.097	0.008	71	433	1929	0.141	0.035	0.057
40	Dup.s	68	1345	3882	0.0481246	0.0172152	0.0253589	403	47918	3547	0.008	0.102	0.015	139	361	3811	0.278	0.035	0.062
60	Dup.s	181	928	5869	0.16321	0.0299174	0.0505657	2539	44924	3511	0.053	0.42	0.095	828	0	5222	1	0.137	0.241
80	Dup.s	1797	85	6203	0.954835	0.224625	0.363692	4887	43725	3113	0.101	0.611	0.173	1416	0	6584	1	0.177	0.301
100	Dup.s	7172	311	2828	0.958439	0.7172	0.820454	8929	42039	1071	0.175	0.893	0.293	2659	0	7341	1	0.266	0.42
20	Dup.d	47	1189	1953	0.0380259	0.0235	0.0290482	0	53984	2000	0	0	0	0	874	2000	0	0	0
40	Dup.d	1341	1340	2609	0.500186	0.339494	0.404464	2515	54979	1435	0.044	0.637	0.082	1802	0	2148	1	0.456	0.627
60	Dup.d	6006	2679	44	0.691537	0.992727	0.815202	5468	52630	582	0.094	0.904	0.17	4953	0	1097	1	0.819	0.9
80	Dup.d	7990	3034	10	0.724782	0.99875	0.839992	7195	51484	805	0.123	0.899	0.216	7011	0	989	1	0.876	0.934
100	Dup.d	9987	86	13	0.991462	0.9987	0.995068	8958	50183	1042	0.151	0.896	0.259	8993	0	1007	1	0.899	0.947

## Sheet: medium
Shared CNA proportion	CNA type	FLCNA						SCOPE						HMMcopy
		tp	fp	fn	precision	recall	F1	tp	fp	fn	precision	recall	F1	tp	fp	fn	precision	recall	F1
20	Del.d	1520	1822	480	0.454817	0.76	0.569075	2000	60502	0	0.032	1	0.062	1727	1773	273	0.493	0.864	0.628
40	Del.d	3950	2524	0	0.610133	1	0.757866	3950	53719	0	0.068	1	0.128	3876	3946	74	0.496	0.981	0.659
60	Del.d	6050	2959	0	0.671551	1	0.803506	6050	47791	0	0.112	1	0.202	6047	6113	3	0.497	1	0.664
80	Del.d	8000	4085	0	0.661978	1	0.796614	8000	42914	0	0.157	1	0.272	8000	8014	0	0.5	1	0.666
100	Del.d	10000	4124	0	0.708015	1	0.82905	10000	31335	0	0.242	1	0.39	10000	9910	0	0.502	1	0.669
20	Del.s	48	1161	1952	0.0397022	0.024	0.0299159	0	60300	2000	0	0	0	0	2697	2000	0	0	0
40	Del.s	38	921	3912	0.0396246	0.00962025	0.0154818	1950	65133	2000	0.029	0.494	0.055	1843	3168	2107	0.368	0.467	0.411
60	Del.s	3556	556	2494	0.864786	0.587769	0.699862	6050	62233	0	0.089	1	0.163	5876	1653	174	0.78	0.971	0.865
80	Del.s	7561	3828	439	0.663886	0.945125	0.779927	7999	62941	1	0.113	1	0.203	7800	2045	200	0.792	0.975	0.874
100	Del.s	9921	89	79	0.991109	0.9921	0.991604	9998	65013	2	0.133	1	0.235	9802	2271	198	0.812	0.98	0.888
20	mix	150	1514	1850	0.0901442	0.075	0.0818777	468	46521	1532	0.01	0.234	0.019	335	1182	1665	0.221	0.168	0.191
40	mix	1286	0	2664	1	0.32557	0.491215	3748	29960	202	0.111	0.949	0.199	3200	0	750	1	0.81	0.895
60	mix	2970	85	3080	0.972177	0.490909	0.652389	5846	17663	204	0.249	0.966	0.396	5118	0	932	1	0.846	0.917
80	mix	5681	469	2319	0.92374	0.710125	0.802968	7791	14389	209	0.351	0.974	0.516	6883	0	1117	1	0.86	0.925
100	mix	8484	0	1516	1	0.8484	0.917983	9756	12761	244	0.433	0.976	0.6	8789	0	1211	1	0.879	0.936
20	Dup.s	63	1492	1937	0.0405145	0.0315	0.035443	219	46169	1781	0.005	0.11	0.009	90	629	1910	0.125	0.045	0.066
40	Dup.s	69	1376	3881	0.0477509	0.0174684	0.0255792	0	49723	3950	0	0	0	0	970	3950	0	0	0
60	Dup.s	154	802	5896	0.161088	0.0254545	0.0439623	4024	52651	2026	0.071	0.665	0.128	2180	0	3870	1	0.36	0.53
80	Dup.s	2995	0	5005	1	0.374375	0.544793	7655	52737	345	0.127	0.957	0.224	4819	0	3181	1	0.602	0.752
100	Dup.s	6496	218	3504	0.967531	0.6496	0.777312	9558	54949	442	0.148	0.956	0.257	6144	0	3856	1	0.614	0.761
20	Dup.d	73	1981	1927	0.0355404	0.0365	0.0360138	0	58190	2000	0	0	0	0	2437	2000	0	0	0
40	Dup.d	2257	709	1693	0.760958	0.571392	0.652689	3580	54870	370	0.061	0.906	0.115	3502	876	448	0.8	0.887	0.841
60	Dup.d	6021	2927	29	0.672888	0.995207	0.802907	5460	53951	590	0.092	0.902	0.167	5607	788	443	0.877	0.927	0.901
80	Dup.d	8000	3368	0	0.70373	1	0.826105	7214	53590	786	0.119	0.902	0.21	7487	691	513	0.916	0.936	0.926
100	Dup.d	10000	837	0	0.922765	1	0.959831	8947	51847	1053	0.147	0.895	0.253	9369	626	631	0.937	0.937	0.937

## Sheet: long
Shared CNA proportion	CNA type	FLCNA						SCOPE						HMMcopy
		tp	fp	fn	precision	recall	F1	tp	fp	fn	precision	recall	F1	tp	fp	fn	precision	recall	F1
20	Del.d	1686	2075	314	0.448285	0.843	0.585315	2000	52495	0	0.037	1	0.071	2000	2228	0	0.473	1	0.642
40	Del.d	3950	3896	0	0.503441	1	0.669719	3950	38686	0	0.093	1	0.17	3950	4127	0	0.489	1	0.657
60	Del.d	6050	2967	0	0.670955	1	0.80308	6050	27253	0	0.182	1	0.307	6050	6104	0	0.498	1	0.665
80	Del.d	8000	4352	0	0.647668	1	0.786164	8000	29044	0	0.216	1	0.355	8000	7948	0	0.502	1	0.668
100	Del.d	10000	4278	0	0.700378	1	0.823791	10000	29552	0	0.253	1	0.404	10000	9817	0	0.505	1	0.671
20	Del.s	49	1123	1951	0.0418089	0.0245	0.0308953	0	67696	2000	0	0	0	0	4255	2000	0	0	0
40	Del.s	0	0	3950	0	0	0	950	66432	3000	0.014	0.241	0.027	950	7103	3000	0.118	0.241	0.158
60	Del.s	3882	1671	2168	0.699082	0.641653	0.669137	6049	65447	1	0.085	1	0.156	6048	6004	2	0.502	1	0.668
80	Del.s	7802	4416	198	0.638566	0.97525	0.771788	7999	67776	1	0.106	1	0.191	7999	7774	1	0.507	1	0.673
100	Del.s	9985	1249	15	0.88882	0.9985	0.940473	9999	67494	1	0.129	1	0.229	9998	9597	2	0.51	1	0.676
20	mix	221	281	1779	0.440239	0.1105	0.176659	1211	34095	789	0.034	0.606	0.065	1078	2113	922	0.338	0.539	0.415
40	mix	1059	0	2891	1	0.268101	0.422839	3796	16113	154	0.191	0.961	0.318	3539	2317	411	0.604	0.896	0.722
60	mix	3604	275	2446	0.929105	0.595702	0.725954	5779	11627	271	0.332	0.955	0.493	5462	3371	588	0.618	0.903	0.734
80	mix	6273	680	1727	0.9022	0.784125	0.839029	7507	11780	493	0.389	0.938	0.55	7276	4264	724	0.631	0.909	0.745
100	mix	8392	0	1608	1	0.8392	0.912571	9167	12963	833	0.414	0.917	0.571	9164	5207	836	0.638	0.916	0.752
20	Dup.s	71	1366	1929	0.0494085	0.0355	0.0413151	391	51026	1609	0.008	0.196	0.015	268	1383	1732	0.162	0.134	0.147
40	Dup.s	84	1485	3866	0.0535373	0.0212658	0.0304403	0	61423	3950	0	0	0	0	2816	3950	0	0	0
60	Dup.s	0	0	6050	0	0	0	4497	62931	1553	0.067	0.743	0.122	3547	418	2503	0.895	0.586	0.708
80	Dup.s	2268	0	5732	1	0.2835	0.441761	7800	63877	200	0.109	0.975	0.196	6428	0	1572	1	0.803	0.891
100	Dup.s	6486	5	3514	0.99923	0.6486	0.786611	9692	67032	308	0.126	0.969	0.224	8167	0	1833	1	0.817	0.899
20	Dup.d	49	1313	1951	0.0359765	0.0245	0.0291493	0	57967	2000	0	0	0	0	2508	2000	0	0	0
40	Dup.d	2421	1012	1529	0.705214	0.612911	0.655831	3640	55950	310	0.061	0.922	0.115	3677	928	273	0.798	0.931	0.86
60	Dup.d	6043	3319	7	0.645482	0.998843	0.784194	5465	56446	585	0.088	0.903	0.161	5647	1185	403	0.827	0.933	0.877
80	Dup.d	8000	3542	0	0.693121	1	0.818749	7232	56280	768	0.114	0.904	0.202	7415	1490	585	0.833	0.927	0.877
100	Dup.d	10000	974	0	0.911245	1	0.953562	8963	55902	1037	0.138	0.896	0.239	9086	2013	914	0.819	0.909	0.861
