# Supplementary material for: A statistical learning method for simultaneous copy number estimation and subclone clustering with single-cell sequencing data
Source: HighWire-hosted journal article supplement (doi:10.1101/gr.278098.123), 2024-01-01
Supplement: Supplemental_Table_S6.xlsx [file Supplemental_Table_S6.xlsx]

## Sheet: super short
Supplemental Table S6. Assessment of FLCNA to detect CNAs using simulation data with three clusters. CNA calls were generated by FLCNA, SCOPE and HMMcopy, respectively. For each of three clusters, we added signals of 50 CNA segments to the background signals with varied lengths (super short: 2~5 markers, short: 5~10 markers, medium: 10~20 markers, and long: 20~35 markers) and varied CNA proportio…
Shared CNA proportion	CNA type	FLCNA						SCOPE						HMMcopy
		tp	fp	fn	precision	recall	F1	tp	fp	fn	precision	recall	F1	tp	fp	fn	precision	recall	F1
20	Del.d	357	1224	1643	0.225806	0.1785	0.199386	700	54349	1300	0.013	0.35	0.025	135	334	1865	0.288	0.068	0.109
40	Del.d	4000	2471	0	0.618142	1	0.764015	3999	58985	1	0.063	1	0.119	977	0	3023	1	0.244	0.393
60	Del.d	6000	2720	0	0.688073	1	0.815217	5998	61223	2	0.089	1	0.164	1357	0	4643	1	0.226	0.369
80	Del.d	8000	3273	0	0.70966	1	0.830177	7998	62217	2	0.114	1	0.205	1828	0	6172	1	0.228	0.372
100	Del.d	10000	27	0	0.997307	1	0.998652	9996	63120	4	0.137	1	0.241	2242	0	7758	1	0.224	0.366
20	Del.s	32	1188	1968	0.0262295	0.016	0.0198758	0	47807	2000	0	0	0	0	470	2000	0	0	0
40	Del.s	23	889	3977	0.0252193	0.00575	0.00936482	0	49263	4000	0	0	0	0	489	4000	0	0	0
60	Del.s	1123	766	4877	0.594494	0.187167	0.2847	2147	48559	3853	0.042	0.358	0.076	487	0	5513	1	0.081	0.15
80	Del.s	7205	3115	795	0.698159	0.900625	0.786572	7974	44454	26	0.152	0.997	0.264	1981	0	6019	1	0.248	0.397
100	Del.s	9577	3553	423	0.729398	0.9577	0.828102	9964	43781	36	0.185	0.996	0.313	2518	0	7482	1	0.252	0.402
20	mix	20	1051	1980	0.0186741	0.01	0.0130251	0	49540	2000	0	0	0	0	492	2000	0	0	0
40	mix	650	718	3350	0.475146	0.1625	0.242176	2442	48271	1558	0.048	0.611	0.089	608	0	3392	1	0.152	0.264
60	mix	1826	14	4174	0.992391	0.304333	0.465816	5452	45921	548	0.106	0.909	0.19	1409	0	4591	1	0.235	0.38
80	mix	4279	107	3721	0.975604	0.534875	0.690941	7262	44331	738	0.141	0.908	0.244	2004	0	5996	1	0.25	0.401
100	mix	6127	1	3873	0.999837	0.6127	0.759797	9101	39739	899	0.186	0.91	0.309	2474	0	7526	1	0.247	0.397
20	Dup.s	10	1157	1990	0.00856898	0.005	0.00631512	0	49344	2000	0	0	0	0	495	2000	0	0	0
40	Dup.s	14	923	3986	0.0149413	0.0035	0.00567146	0	51250	4000	0	0	0	0	482	4000	0	0	0
60	Dup.s	26	797	5974	0.0315917	0.00433333	0.00762128	0	53190	6000	0	0	0	0	468	6000	0	0	0
80	Dup.s	733	452	7267	0.618565	0.091625	0.159608	2001	52696	5999	0.037	0.25	0.064	729	0	7271	1	0.091	0.167
100	Dup.s	7325	175	2675	0.976667	0.7325	0.837143	7837	48364	2163	0.139	0.784	0.237	2536	0	7464	1	0.254	0.405
20	Dup.d	16	857	1984	0.0183276	0.008	0.0111382	0	45673	2000	0	0	0	0	485	2000	0	0	0
40	Dup.d	662	1020	3338	0.393579	0.1655	0.233017	1111	48814	2889	0.022	0.278	0.041	364	113	3636	0.763	0.091	0.163
60	Dup.d	5694	2421	306	0.701664	0.949	0.806801	5332	48514	668	0.099	0.889	0.178	1428	0	4572	1	0.238	0.384
80	Dup.d	7772	3147	228	0.711787	0.9715	0.821608	7152	48748	848	0.128	0.894	0.224	1904	0	6096	1	0.238	0.384
100	Dup.d	9770	2108	230	0.822529	0.977	0.893135	8971	48629	1029	0.156	0.897	0.265	2313	0	7687	1	0.231	0.376

## Sheet: short
Shared CNA proportion	CNA type	FLCNA						SCOPE						HMMcopy
		tp	fp	fn	precision	recall	F1	tp	fp	fn	precision	recall	F1	tp	fp	fn	precision	recall	F1
20	Del.d	1170	1645	830	0.415631	0.585	0.485981	2000	61332	0	0.032	1	0.061	504	39	1496	0.928	0.252	0.396
40	Del.d	4000	3098	0	0.563539	1	0.720851	4000	63023	0	0.06	1	0.113	1097	0	2903	1	0.274	0.43
60	Del.d	6000	3375	0	0.64	1	0.780488	6000	62835	0	0.087	1	0.16	1980	0	4020	1	0.33	0.496
80	Del.d	8000	3782	0	0.679002	1	0.808816	8000	60236	0	0.117	1	0.21	2931	0	5069	1	0.366	0.536
100	Del.d	10000	186	0	0.98174	1	0.990786	10000	59300	0	0.144	1	0.252	3830	0	6170	1	0.383	0.554
20	Del.s	22	763	1978	0.0280255	0.011	0.0157989	0	50818	2000	0	0	0	0	544	2000	0	0	0
40	Del.s	34	792	3966	0.0411622	0.0085	0.0140903	0	55521	4000	0	0	0	0	617	4000	0	0	0
60	Del.s	3460	381	2540	0.900807	0.576667	0.703181	5997	54039	3	0.1	1	0.182	1942	0	4058	1	0.324	0.489
80	Del.s	7823	3675	177	0.680379	0.977875	0.802441	7995	56082	5	0.125	0.999	0.222	2736	0	5264	1	0.342	0.51
100	Del.s	9916	473	84	0.954471	0.9916	0.972681	9992	57442	8	0.148	0.999	0.258	3703	0	6297	1	0.37	0.54
20	mix	181	791	1819	0.186214	0.0905	0.121803	588	49521	1412	0.012	0.294	0.023	259	336	1741	0.435	0.13	0.2
40	mix	1225	0	2775	1	0.30625	0.4689	3696	44016	304	0.077	0.924	0.143	1728	0	2272	1	0.432	0.603
60	mix	2608	72	3392	0.973134	0.434667	0.600922	5579	37630	421	0.129	0.93	0.227	2998	0	3002	1	0.5	0.666
80	mix	5519	313	2481	0.946331	0.689875	0.798005	7496	33573	504	0.183	0.937	0.306	4677	0	3323	1	0.585	0.738
100	mix	8691	0	1309	1	0.8691	0.929966	9479	27520	521	0.256	0.948	0.403	6459	0	3541	1	0.646	0.785
20	Dup.s	16	974	1984	0.0161616	0.008	0.0107023	0	47648	2000	0	0	0	0	484	2000	0	0	0
40	Dup.s	27	827	3973	0.0316159	0.00675	0.0111248	0	48029	4000	0	0	0	0	494	4000	0	0	0
60	Dup.s	41	822	5959	0.0475087	0.00683333	0.0119481	1887	47388	4113	0.038	0.314	0.068	455	56	5545	0.89	0.076	0.14
80	Dup.s	2186	0	5814	1	0.27325	0.429217	7026	42917	974	0.141	0.878	0.243	2033	0	5967	1	0.254	0.405
100	Dup.s	8117	1281	1883	0.863694	0.8117	0.83689	9006	43048	994	0.173	0.901	0.29	2713	0	7287	1	0.271	0.427
20	Dup.d	23	847	1977	0.0264368	0.0115	0.0160279	0	54407	2000	0	0	0	0	831	2000	0	0	0
40	Dup.d	2241	918	1759	0.709402	0.56025	0.626065	3633	53370	367	0.064	0.908	0.119	2653	0	1347	1	0.663	0.798
60	Dup.d	5958	2389	42	0.713789	0.993	0.830557	5422	52719	578	0.093	0.904	0.169	4753	0	1247	1	0.792	0.884
80	Dup.d	7987	3169	13	0.715938	0.998375	0.83389	7183	50771	817	0.124	0.898	0.218	6910	0	1090	1	0.864	0.927
100	Dup.d	9982	136	18	0.986559	0.9982	0.992345	8961	49747	1039	0.153	0.896	0.261	8954	0	1046	1	0.895	0.945

## Sheet: medium
Shared CNA proportion	CNA type	FLCNA						SCOPE						HMMcopy
		tp	fp	fn	precision	recall	F1	tp	fp	fn	precision	recall	F1	tp	fp	fn	precision	recall	F1
20	Del.d	1562	1900	438	0.451184	0.781	0.571952	2000	60212	0	0.032	1	0.062	1736	1767	264	0.496	0.868	0.631
40	Del.d	4000	3592	0	0.52687	1	0.690131	4000	52066	0	0.071	1	0.133	3862	3935	138	0.495	0.966	0.655
60	Del.d	6000	3582	0	0.626174	1	0.770119	6000	47118	0	0.113	1	0.203	5997	6060	3	0.497	1	0.664
80	Del.d	8000	4059	0	0.663405	1	0.797647	8000	41960	0	0.16	1	0.276	8000	8024	0	0.499	1	0.666
100	Del.d	10000	4210	0	0.70373	1	0.826105	10000	30065	0	0.25	1	0.399	10000	9918	0	0.502	1	0.668
20	Del.s	23	784	1977	0.0285006	0.0115	0.0163876	0	61034	2000	0	0	0	0	2688	2000	0	0	0
40	Del.s	0	0	4000	0	0	0	1400	65925	2600	0.021	0.35	0.039	1335	3695	2665	0.265	0.334	0.296
60	Del.s	3480	664	2520	0.839768	0.58	0.68612	6000	62420	0	0.088	1	0.161	5794	1645	206	0.779	0.966	0.862
80	Del.s	7853	4142	147	0.654689	0.981625	0.785496	7999	63086	1	0.113	1	0.202	7796	1994	204	0.796	0.975	0.876
100	Del.s	9996	54	4	0.994627	0.9996	0.997107	9998	64692	2	0.134	1	0.236	9781	2286	219	0.811	0.978	0.886
20	mix	182	249	1818	0.422274	0.091	0.149733	601	45828	1399	0.013	0.3	0.025	499	1056	1501	0.321	0.25	0.281
40	mix	1285	0	2715	1	0.32125	0.486282	3813	29851	187	0.113	0.953	0.202	3264	0	736	1	0.816	0.899
60	mix	2851	185	3149	0.939065	0.475167	0.631031	5791	21166	209	0.215	0.965	0.351	5174	0	826	1	0.862	0.926
80	mix	5821	205	2179	0.965981	0.727625	0.83003	7799	16685	201	0.319	0.975	0.48	7026	0	974	1	0.878	0.935
100	mix	8752	0	1248	1	0.8752	0.933447	9748	15578	252	0.385	0.975	0.552	8923	0	1077	1	0.892	0.943
20	Dup.s	31	1136	1969	0.0265638	0.0155	0.0195769	0	44443	2000	0	0	0	0	727	2000	0	0	0
40	Dup.s	31	836	3969	0.0357555	0.00775	0.0127389	0	48959	4000	0	0	0	0	983	4000	0	0	0
60	Dup.s	0	0	6000	0	0	0	1868	54560	4132	0.033	0.311	0.06	1097	110	4903	0.909	0.183	0.304
80	Dup.s	2258	0	5742	1	0.28225	0.440242	7657	53392	343	0.125	0.957	0.222	5135	0	2865	1	0.642	0.782
100	Dup.s	7012	287	2988	0.96068	0.7012	0.810683	9573	55747	427	0.147	0.957	0.254	6533	0	3467	1	0.653	0.79
20	Dup.d	23	891	1977	0.0251641	0.0115	0.0157859	0	57548	2000	0	0	0	0	2439	2000	0	0	0
40	Dup.d	2352	1022	1648	0.697095	0.588	0.637917	3627	54873	373	0.062	0.907	0.116	3552	891	448	0.799	0.888	0.841
60	Dup.d	5911	3006	89	0.662891	0.985167	0.792519	5452	54179	548	0.091	0.909	0.166	5557	751	443	0.881	0.926	0.903
80	Dup.d	8000	3301	0	0.707902	1	0.828973	7217	53684	783	0.119	0.902	0.209	7461	659	539	0.919	0.933	0.926
100	Dup.d	10000	0	0	1	1	1	8970	53021	1030	0.145	0.897	0.249	9323	597	677	0.94	0.932	0.936

## Sheet: long
Shared CNA proportion	CNA type	FLCNA						SCOPE						HMMcopy
		tp	fp	fn	precision	recall	F1	tp	fp	fn	precision	recall	F1	tp	fp	fn	precision	recall	F1
20	Del.d	1729	1793	271	0.490914	0.8645	0.626222	2000	52862	0	0.036	1	0.07	2000	2214	0	0.475	1	0.644
40	Del.d	4000	4037	0	0.497698	1	0.664617	4000	39746	0	0.091	1	0.168	4000	4157	0	0.49	1	0.658
60	Del.d	5963	4237	37	0.584608	0.993833	0.736173	6000	26734	0	0.183	1	0.31	6000	6077	0	0.497	1	0.664
80	Del.d	8000	4171	0	0.6573	1	0.793218	8000	27226	0	0.227	1	0.37	8000	7979	0	0.501	1	0.667
100	Del.d	10000	3343	0	0.749457	1	0.856788	10000	27482	0	0.267	1	0.421	10000	9842	0	0.504	1	0.67
20	Del.s	23	1107	1977	0.020354	0.0115	0.0146965	0	68120	2000	0	0	0	0	4213	2000	0	0	0
40	Del.s	0	0	4000	0	0	0	1300	66491	2700	0.019	0.325	0.036	1300	6794	2700	0.161	0.325	0.215
60	Del.s	3544	1135	2456	0.757427	0.590667	0.663733	6000	65105	0	0.084	1	0.156	5997	5975	3	0.501	1	0.667
80	Del.s	7796	4233	204	0.6481	0.9745	0.778471	8000	68983	0	0.104	1	0.188	7996	7810	4	0.506	1	0.672
100	Del.s	10000	698	0	0.934754	1	0.966277	10000	67339	0	0.129	1	0.229	9993	9596	7	0.51	0.999	0.675
20	mix	257	36	1743	0.877133	0.1285	0.22416	1270	33313	730	0.037	0.635	0.069	1190	2023	810	0.37	0.595	0.457
40	mix	960	0	3040	1	0.24	0.387097	3873	18257	127	0.175	0.968	0.296	3630	2389	370	0.603	0.907	0.725
60	mix	3106	0	2894	1	0.517667	0.682188	5817	14624	183	0.285	0.97	0.44	5465	3330	535	0.621	0.911	0.739
80	mix	5664	663	2336	0.895211	0.708	0.790675	7519	12738	481	0.371	0.94	0.532	7347	4350	653	0.628	0.918	0.746
100	mix	8426	3	1574	0.999644	0.8426	0.914428	9187	13460	813	0.406	0.919	0.563	9226	5242	774	0.638	0.923	0.754
20	Dup.s	22	919	1978	0.0233794	0.011	0.0149609	0	51733	2000	0	0	0	0	1678	2000	0	0	0
40	Dup.s	0	0	4000	0	0	0	0	60492	4000	0	0	0	0	2806	4000	0	0	0
60	Dup.s	0	0	6000	0	0	0	2111	64262	3889	0.032	0.352	0.058	1651	2307	4349	0.417	0.275	0.332
80	Dup.s	1584	0	6416	1	0.198	0.330551	7783	63432	217	0.109	0.973	0.197	6370	0	1630	1	0.796	0.887
100	Dup.s	5792	0	4208	1	0.5792	0.733536	9683	65348	317	0.129	0.968	0.228	8143	0	1857	1	0.814	0.898
20	Dup.d	0	0	2000	0	0	0	0	57789	2000	0	0	0	0	2511	2000	0	0	0
40	Dup.d	2270	893	1730	0.717673	0.5675	0.633813	3635	56718	365	0.06	0.909	0.113	3686	932	314	0.798	0.921	0.855
60	Dup.d	5941	3212	59	0.649077	0.990167	0.784135	5408	55551	592	0.089	0.901	0.162	5571	1194	429	0.824	0.928	0.873
80	Dup.d	8000	3552	0	0.692521	1	0.818331	7211	54591	789	0.117	0.901	0.207	7330	1584	670	0.822	0.916	0.867
100	Dup.d	10000	0	0	1	1	1	8990	53445	1010	0.144	0.899	0.248	9002	2067	998	0.813	0.9	0.855
