# Supplementary material for: A statistical learning method for simultaneous copy number estimation and subclone clustering with single-cell sequencing data
Source: HighWire-hosted journal article supplement (doi:10.1101/gr.278098.123), 2024-01-01
Supplement: Supplemental_Table_S7.xlsx [file Supplemental_Table_S7.xlsx]

## Sheet: super short
Supplemental Table S7. Assessment of FLCNA to detect CNAs using simulation data with five clusters and varied numbers of CNAs. CNA calls were generated by FLCNA, SCOPE and HMMcopy, respectively. For each of five clusters, we added signals of varied numbers of CNA segments (20~80) to the background signals with varied lengths (super short: 2~5 markers, short: 5~10 markers, medium: 10~20 markers, a…
Shared CNA proportion	CNA type	FLCNA						SCOPE						HMMcopy
		tp	fp	fn	precision	recall	F1	tp	fp	fn	precision	recall	F1	tp	fp	fn	precision	recall	F1
20	Del.d	552	1885	1231	0.226508	0.309591	0.261611	1133	51352	650	0.022	0.635	0.042	245	215	1538	0.533	0.137	0.218
40	Del.d	3189	2945	356	0.519889	0.899577	0.658952	3145	57314	400	0.052	0.887	0.098	735	0	2810	1	0.207	0.343
60	Del.d	5443	2521	1	0.683451	0.999816	0.811903	5443	59263	1	0.084	1	0.155	1209	0	4235	1	0.222	0.363
80	Del.d	7206	2717	0	0.726192	1	0.84138	7206	59432	0	0.108	1	0.195	1566	0	5640	1	0.217	0.357
100	Del.d	8989	68	0	0.992492	1	0.996232	8988	60965	1	0.128	1	0.228	2033	0	6956	1	0.226	0.369
20	Del.s	51	1475	1732	0.0334207	0.0286035	0.030825	604	47212	1179	0.013	0.339	0.024	92	376	1691	0.197	0.052	0.082
40	Del.s	127	1543	3418	0.0760479	0.0358251	0.0487057	1048	48285	2497	0.021	0.296	0.04	286	183	3259	0.61	0.081	0.143
60	Del.s	1995	1111	3449	0.642305	0.366458	0.466667	3465	47066	1979	0.069	0.636	0.124	791	0	4653	1	0.145	0.254
80	Del.s	4215	3386	2991	0.554532	0.584929	0.569325	4596	47458	2610	0.088	0.638	0.155	1130	0	6076	1	0.157	0.271
100	Del.s	7407	3470	1582	0.680978	0.824007	0.745696	7924	45115	1065	0.149	0.882	0.255	2004	0	6985	1	0.223	0.365
20	mix	39	1381	1744	0.0274648	0.0218732	0.0243522	181	46296	1602	0.004	0.102	0.008	33	434	1750	0.071	0.019	0.029
40	mix	608	1055	2937	0.365604	0.171509	0.233487	2035	45312	1510	0.043	0.574	0.08	505	0	3040	1	0.142	0.249
60	mix	1607	838	3837	0.65726	0.295187	0.407403	4417	42611	1027	0.094	0.811	0.168	1111	0	4333	1	0.204	0.339
80	mix	3408	838	3798	0.802638	0.472939	0.59518	5878	40227	1328	0.127	0.816	0.221	1517	0	5689	1	0.211	0.348
100	mix	5467	9	3522	0.998356	0.608188	0.755894	8225	34977	764	0.19	0.915	0.315	2102	0	6887	1	0.234	0.379
20	Dup.s	9	1466	1774	0.00610169	0.00504767	0.00552486	152	48768	1631	0.003	0.085	0.006	48	420	1735	0.103	0.027	0.043
40	Dup.s	27	1371	3518	0.0193133	0.00761636	0.0109245	304	50304	3241	0.006	0.086	0.011	76	413	3469	0.155	0.021	0.038
60	Dup.s	150	1105	5294	0.119522	0.0275533	0.0447828	1965	50033	3479	0.038	0.361	0.068	477	0	4967	1	0.088	0.161
80	Dup.s	1801	0	5405	1	0.249931	0.399911	3553	49946	3653	0.066	0.493	0.117	1159	0	6047	1	0.161	0.277
100	Dup.s	3950	1543	5039	0.719097	0.439426	0.545505	4491	49339	4498	0.083	0.5	0.143	1462	0	7527	1	0.163	0.28
20	Dup.d	39	1488	1744	0.0255403	0.0218732	0.023565	139	45940	1644	0.003	0.078	0.006	38	421	1745	0.083	0.021	0.034
40	Dup.d	1120	1338	2425	0.455655	0.315938	0.373147	2035	46630	1510	0.042	0.574	0.078	513	0	3032	1	0.145	0.253
60	Dup.d	4335	2579	1109	0.626989	0.796289	0.70157	4183	46190	1261	0.083	0.768	0.15	1126	0	4318	1	0.207	0.343
80	Dup.d	6996	2448	210	0.740788	0.970858	0.84036	6341	46938	865	0.119	0.88	0.21	1688	0	5518	1	0.234	0.38
100	Dup.d	8797	2065	192	0.809888	0.978641	0.886303	7948	47225	1041	0.144	0.884	0.248	2122	0	6867	1	0.236	0.382

## Sheet: short
Shared CNA proportion	CNA type	FLCNA						SCOPE						HMMcopy
		tp	fp	fn	precision	recall	F1	tp	fp	fn	precision	recall	F1	tp	fp	fn	precision	recall	F1
20	Del.d	883	1582	900	0.358215	0.495233	0.415725	1373	60117	410	0.022	0.77	0.043	323	218	1460	0.597	0.181	0.278
40	Del.d	3545	2650	0	0.572236	1	0.727926	3545	60829	0	0.055	1	0.104	913	0	2632	1	0.258	0.41
60	Del.d	5444	3020	0	0.643195	1	0.782859	5444	60709	0	0.082	1	0.152	1660	0	3784	1	0.305	0.467
80	Del.d	7206	3105	0	0.698865	1	0.822744	7206	61137	0	0.105	1	0.191	2552	0	4654	1	0.354	0.523
100	Del.d	8989	2957	0	0.752469	1	0.858753	8989	61266	0	0.128	1	0.227	3366	0	5623	1	0.374	0.545
20	Del.s	58	1294	1725	0.0428994	0.0325294	0.0370016	200	50337	1583	0.004	0.112	0.008	56	493	1727	0.102	0.031	0.048
40	Del.s	212	742	3333	0.222222	0.0598025	0.0942432	1049	52944	2496	0.019	0.296	0.036	464	147	3081	0.759	0.131	0.223
60	Del.s	2546	1266	2898	0.667891	0.467671	0.55013	4191	53622	1253	0.072	0.77	0.133	1351	0	4093	1	0.248	0.398
80	Del.s	5310	3055	1896	0.634788	0.736886	0.682037	6361	54932	845	0.104	0.883	0.186	2264	0	4942	1	0.314	0.478
100	Del.s	8925	909	64	0.907566	0.99288	0.948308	8982	54448	7	0.142	0.999	0.248	3299	0	5690	1	0.367	0.537
20	mix	185	1397	1598	0.116941	0.103758	0.109955	655	46141	1128	0.014	0.367	0.027	305	294	1478	0.509	0.171	0.256
40	mix	918	890	2627	0.507743	0.258956	0.342985	2492	39219	1053	0.06	0.703	0.11	1295	0	2250	1	0.365	0.535
60	mix	2566	109	2878	0.959252	0.471345	0.632098	5161	32979	283	0.135	0.948	0.237	2974	0	2470	1	0.546	0.707
80	mix	5087	167	2119	0.968215	0.705939	0.816533	6931	29400	275	0.191	0.962	0.318	4441	0	2765	1	0.616	0.763
100	mix	7528	0	1461	1	0.837468	0.911546	8700	25116	289	0.257	0.968	0.406	6143	0	2846	1	0.683	0.812
20	Dup.s	31	1440	1752	0.0210741	0.0173864	0.0190535	171	48020	1612	0.004	0.096	0.007	40	458	1743	0.08	0.022	0.035
40	Dup.s	85	1417	3460	0.0565912	0.0239774	0.0336834	324	48150	3221	0.007	0.091	0.012	81	400	3464	0.168	0.023	0.04
60	Dup.s	46	902	5398	0.0485232	0.00844967	0.014393	3168	46160	2276	0.064	0.582	0.116	943	0	4501	1	0.173	0.295
80	Dup.s	1958	635	5248	0.75511	0.271718	0.399633	4199	46964	3007	0.082	0.583	0.144	1349	0	5857	1	0.187	0.315
100	Dup.s	4817	767	4172	0.862643	0.535877	0.661086	7224	44784	1765	0.139	0.804	0.237	2295	0	6694	1	0.255	0.407
20	Dup.d	122	1408	1661	0.0797386	0.068424	0.0736493	654	51108	1129	0.013	0.367	0.024	459	370	1324	0.554	0.257	0.351
40	Dup.d	1384	1381	2161	0.500542	0.390409	0.438669	2477	53720	1068	0.044	0.699	0.083	2009	0	1536	1	0.567	0.723
60	Dup.d	5374	2713	70	0.664523	0.987142	0.794324	4933	52169	511	0.086	0.906	0.158	4268	0	1176	1	0.784	0.879
80	Dup.d	7201	3115	5	0.698042	0.999306	0.821938	6516	52114	690	0.111	0.904	0.198	5964	0	1242	1	0.828	0.906
100	Dup.d	8982	237	7	0.974292	0.999221	0.986599	8100	52018	889	0.135	0.901	0.234	7674	0	1315	1	0.854	0.921

## Sheet: medium
Shared CNA proportion	CNA type	FLCNA						SCOPE						HMMcopy
		tp	fp	fn	precision	recall	F1	tp	fp	fn	precision	recall	F1	tp	fp	fn	precision	recall	F1
20	Del.d	1079	1507	704	0.417247	0.60516	0.493935	1343	59726	440	0.022	0.753	0.043	1219	1817	564	0.402	0.684	0.506
40	Del.d	3545	2937	0	0.546899	1	0.707091	3545	56472	0	0.059	1	0.112	3342	3309	203	0.502	0.943	0.656
60	Del.d	5444	3350	0	0.619058	1	0.764714	5444	49305	0	0.099	1	0.181	5306	5249	138	0.503	0.975	0.663
80	Del.d	7206	3610	0	0.666235	1	0.799689	7206	41412	0	0.148	1	0.258	7169	7110	37	0.502	0.995	0.667
100	Del.d	8989	3281	0	0.7326	1	0.845665	8989	39551	0	0.185	1	0.313	8985	8801	4	0.505	1	0.671
20	Del.s	56	1400	1727	0.0384615	0.0314077	0.0345786	200	58640	1583	0.003	0.112	0.007	175	2363	1608	0.069	0.098	0.081
40	Del.s	98	1143	3447	0.0789686	0.0276446	0.0409528	1049	62131	2496	0.017	0.296	0.031	1014	3608	2531	0.219	0.286	0.248
60	Del.s	3494	825	1950	0.808984	0.641807	0.715764	5444	63247	0	0.079	1	0.147	5155	1774	289	0.744	0.947	0.833
80	Del.s	6905	3884	301	0.640004	0.958229	0.767435	7203	64206	3	0.101	1	0.183	6885	2011	321	0.774	0.955	0.855
100	Del.s	8984	1031	5	0.897054	0.999444	0.945485	8986	66010	3	0.12	1	0.214	8639	2306	350	0.789	0.961	0.867
20	mix	175	1628	1608	0.0970605	0.0981492	0.0976018	476	42107	1307	0.011	0.267	0.021	425	1059	1358	0.286	0.238	0.26
40	mix	1036	659	2509	0.611209	0.292243	0.39542	3018	29370	527	0.093	0.851	0.168	2608	0	937	1	0.736	0.848
60	mix	3112	228	2332	0.931737	0.571639	0.708561	5268	23315	176	0.184	0.968	0.31	4668	0	776	1	0.857	0.923
80	mix	5375	279	1831	0.950654	0.745906	0.835925	6947	19959	259	0.258	0.964	0.407	6356	0	850	1	0.882	0.937
100	mix	7910	0	1079	1	0.879964	0.93615	8593	17154	396	0.334	0.956	0.495	8036	0	953	1	0.894	0.944
20	Dup.s	55	1380	1728	0.0383275	0.0308469	0.0341827	173	46400	1610	0.004	0.097	0.007	96	632	1687	0.132	0.054	0.076
40	Dup.s	86	1079	3459	0.0738197	0.0242595	0.036518	0	49513	3545	0	0	0	0	968	3545	0	0	0
60	Dup.s	84	1556	5360	0.0512195	0.0154298	0.0237154	3316	50609	2128	0.061	0.609	0.112	2274	0	3170	1	0.418	0.589
80	Dup.s	1886	91	5320	0.953971	0.261726	0.410759	5135	51790	2071	0.09	0.713	0.16	3591	0	3615	1	0.498	0.665
100	Dup.s	6722	329	2267	0.95334	0.747803	0.838155	8541	53337	448	0.138	0.95	0.241	5793	0	3196	1	0.644	0.784
20	Dup.d	47	1072	1736	0.0420018	0.0263601	0.0323915	0	56583	1783	0	0	0	0	2243	1783	0	0	0
40	Dup.d	1433	1477	2112	0.49244	0.404231	0.443997	2411	55390	1134	0.042	0.68	0.079	2423	1515	1122	0.615	0.683	0.648
60	Dup.d	5416	2678	28	0.669138	0.994857	0.800118	4884	54746	560	0.082	0.897	0.15	4930	817	514	0.858	0.906	0.881
80	Dup.d	7206	3003	0	0.705848	1	0.827562	6438	53564	768	0.107	0.893	0.192	6612	806	594	0.891	0.918	0.904
100	Dup.d	8989	663	0	0.93131	1	0.964433	8035	52220	954	0.133	0.894	0.232	8290	799	699	0.912	0.922	0.917

## Sheet: long
Shared CNA proportion	CNA type	FLCNA						SCOPE						HMMcopy
		tp	fp	fn	precision	recall	F1	tp	fp	fn	precision	recall	F1	tp	fp	fn	precision	recall	F1
20	Del.d	1439	1585	344	0.47586	0.807067	0.59871	1783	54183	0	0.032	1	0.062	1783	2017	0	0.469	1	0.639
40	Del.d	3545	2723	0	0.565571	1	0.722511	3545	41534	0	0.079	1	0.146	3545	3712	0	0.488	1	0.656
60	Del.d	5444	3215	0	0.62871	1	0.772034	5444	36129	0	0.131	1	0.232	5444	5494	0	0.498	1	0.665
80	Del.d	7206	3577	0	0.668274	1	0.801156	7206	33280	0	0.178	1	0.302	7206	7115	0	0.503	1	0.669
100	Del.d	8989	3638	0	0.711887	1	0.831699	8989	32001	0	0.219	1	0.36	8989	8656	0	0.509	1	0.675
20	Del.s	48	1493	1735	0.0311486	0.0269209	0.0288809	0	65969	1783	0	0	0	0	3831	1783	0	0	0
40	Del.s	99	1364	3446	0.0676692	0.0279267	0.0395367	0	69459	3545	0	0	0	0	7225	3545	0	0	0
60	Del.s	3223	1224	2221	0.724758	0.592028	0.651704	5444	66045	0	0.076	1	0.142	5444	5423	0	0.501	1	0.668
80	Del.s	6895	4444	311	0.608078	0.956842	0.743597	7206	65611	0	0.099	1	0.18	7202	6929	4	0.51	0.999	0.675
100	Del.s	8989	3286	0	0.732301	1	0.845467	8989	66863	0	0.119	1	0.212	8985	8341	4	0.519	1	0.683
20	mix	189	806	1594	0.18995	0.106001	0.136069	1072	32494	711	0.032	0.601	0.061	1006	1892	777	0.347	0.564	0.43
40	mix	1310	0	2235	1	0.369535	0.53965	3376	19747	169	0.146	0.952	0.253	3216	2124	329	0.602	0.907	0.724
60	mix	3233	387	2211	0.893094	0.593865	0.713372	5084	14614	360	0.258	0.934	0.404	4985	3050	459	0.62	0.916	0.74
80	mix	5333	242	1873	0.956592	0.740078	0.83452	6507	12681	699	0.339	0.903	0.493	6619	3802	587	0.635	0.919	0.751
100	mix	8030	0	959	1	0.893314	0.943651	7878	12357	1111	0.389	0.876	0.539	8293	4439	696	0.651	0.923	0.764
20	Dup.s	33	1770	1750	0.0183028	0.0185081	0.0184049	0	50041	1783	0	0	0	0	1638	1783	0	0	0
40	Dup.s	95	1396	3450	0.0637156	0.0267983	0.0377284	0	57967	3545	0	0	0	0	2706	3545	0	0	0
60	Dup.s	58	855	5386	0.0635268	0.0106539	0.0182476	4014	60483	1430	0.062	0.737	0.115	3309	422	2135	0.887	0.608	0.721
80	Dup.s	1957	0	5249	1	0.271579	0.427153	7038	61925	168	0.102	0.977	0.185	5776	0	1430	1	0.802	0.89
100	Dup.s	6196	25	2793	0.995981	0.689287	0.814727	8748	63736	241	0.121	0.973	0.215	7417	0	1572	1	0.825	0.904
20	Dup.d	48	1191	1735	0.0387409	0.0269209	0.031767	0	57929	1783	0	0	0	0	2312	1783	0	0	0
40	Dup.d	2012	921	1533	0.685987	0.56756	0.621179	3204	56506	341	0.054	0.904	0.101	3222	944	323	0.773	0.909	0.836
60	Dup.d	5422	2885	22	0.652703	0.995959	0.788597	4934	55262	510	0.082	0.906	0.15	4994	1212	450	0.805	0.917	0.857
80	Dup.d	7206	2967	0	0.708346	1	0.829277	6500	55115	706	0.105	0.902	0.189	6469	1633	737	0.798	0.898	0.845
100	Dup.d	8989	2	0	0.999778	1	0.999889	8089	54875	900	0.128	0.9	0.225	8098	1968	891	0.804	0.901	0.85
